# Supplementary material for: Complex factors combinations driving tea growers to adopt ecological agricultural practices in tea gardens
Source: Frontiers journal article supplement (doi:10.3389/fevo.2024.1431779), 2024-10-21
Supplement: Table_4.xlsx [file Table_4.xlsx]

## Sheet: Sheet1
Table S4. Necessity analysis results
Conditions	Tea growers' adoption of TGEAP		Tea growers' non-adoption of TGEAP
	Consistency	Coverage	Consistency	Coverage
TGPE	0.53997	0.383473	0.699493	0.679048
~TGPE	0.548065	0.571589	0.364912	0.520226
EPA	0.713064	0.517368	0.560913	0.556312
~EPA	0.388485	0.392926	0.513379	0.709785
AISS	0.662289	0.523319	0.53265	0.575324
~AISS	0.462548	0.419965	0.558678	0.693379
PE	0.602198	0.588407	0.41373	0.552596
~PE	0.542109	0.403501	0.691841	0.70391
TIA	0.696037	0.568897	0.470704	0.525898
~TIA	0.419943	0.367254	0.614144	0.734175
age	0.478429	0.488197	0.516394	0.720297
~age	0.725892	0.52337	0.633081	0.623948
annual income	0.764756	0.550634	0.571414	0.562397
~annual income	0.392226	0.401015	0.54343	0.759485
producers	0.773765	0.521968	0.711614	0.656193
~producers	0.49034	0.554337	0.481596	0.744238
family size	0.607391	0.491991	0.566889	0.627682
~family size	0.540352	0.477177	0.541196	0.653295
